# Supplementary material for: Nanostructured proton-conducting membranes based on polymerizable zwitterionic ionic liquid microemulsions
Source: Royal Society of Chemistry journal article supplement (doi:10.1039/c6nj01284a), 2016-01-01
Supplement: c6nj01284a1.pdf [file c6nj01284a1.pdf]

To be published in *New Journal of Chemistry*

Electronic Supplementary Information for

## Nanostructured proton-conducting membranes based on polymerizable zwitterionic ionic liquid microemulsions

Fei Lu, Xinpei Gao, Panpan Sun and Liqiang Zheng\*

Key Laboratory of Colloid and Interface Chemistry, Shandong University, Ministry of Education, Jinan 250100, China

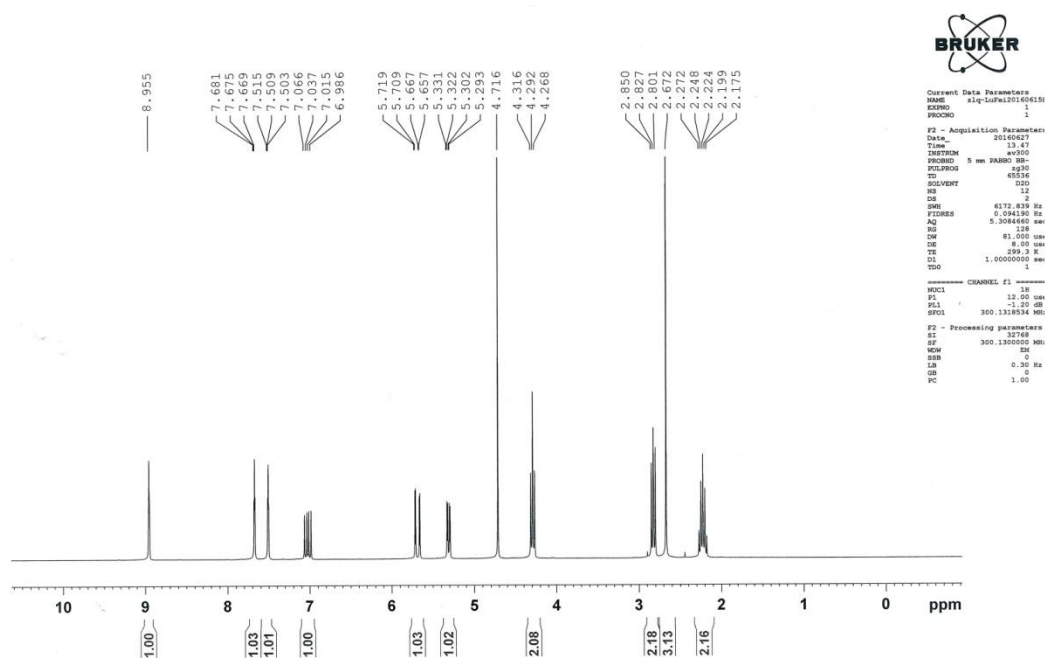

**Fig. S1**  $^1\text{H}$  NMR spectrum of 1-(3-sulfopropyl)-3-ethenyl-imidazolium methanesulfonate ([VIPS][MSA]).

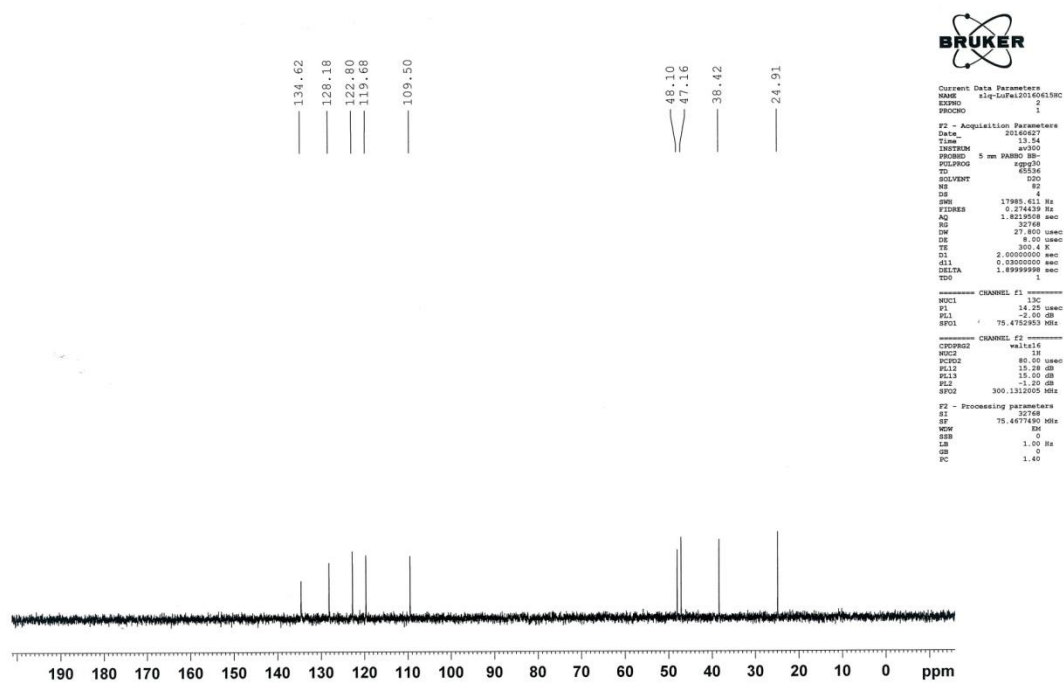

**Fig. S2**  $^{13}\text{C}$  NMR spectrum of 1-(3-sulfopropyl)-3-ethenyl-imidazolium methanesulfonate ([VIPS][MSA]).

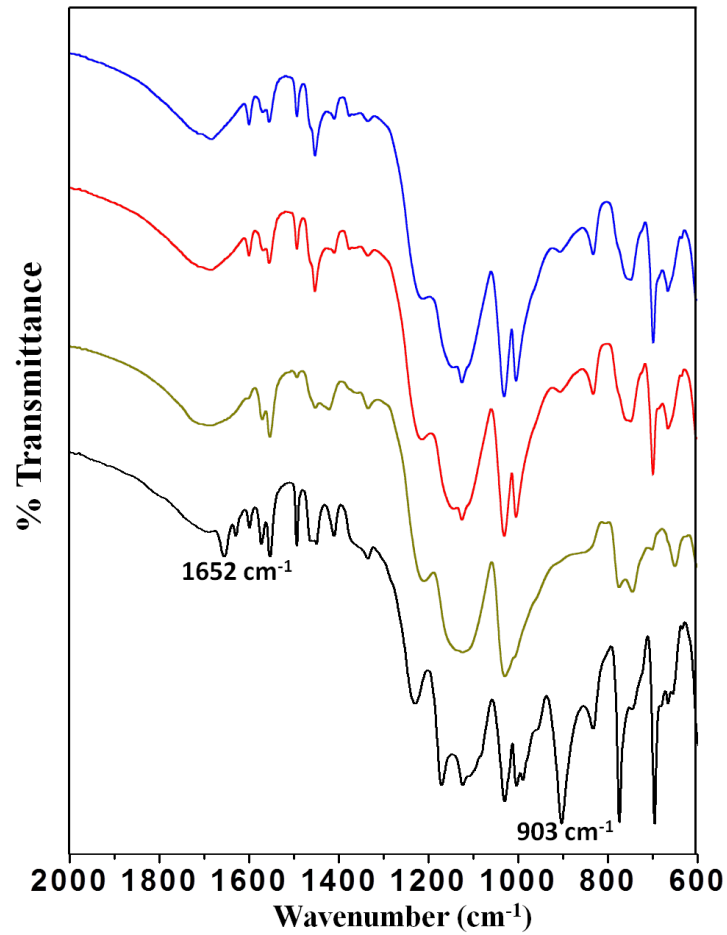

**Fig. S3** FT-IR spectra of the ternary mixture with weight ratio [VIPS][MSA]:DBSA:St = 44:37:19 (black curve), Film-O/IL (green curve), Film-Bi (red curve) and Film-IL/O (blue curve).

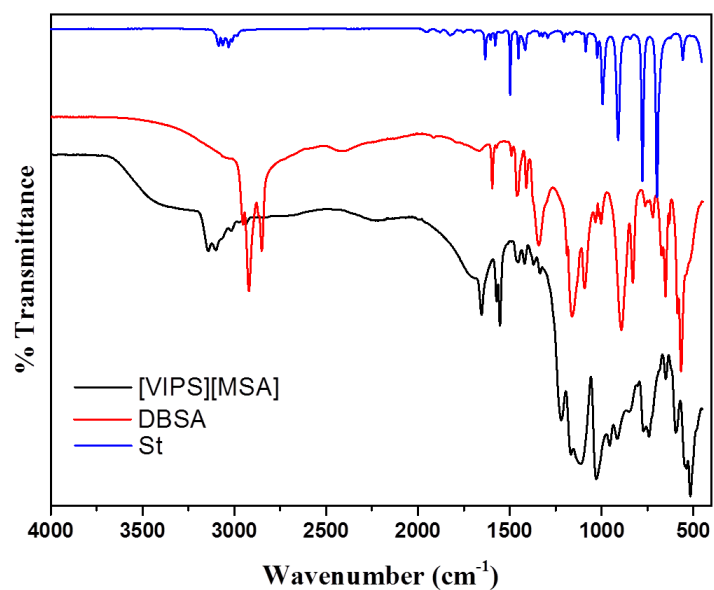

**Fig. S4** FT-IR spectra of [VIPS][MSA] (black curve), DBSA (red curve) and St (blue curve).

**Table S1** Compositions of the different proton conducting membranes.

| Samples   | Weight Fraction |          |          |
|-----------|-----------------|----------|----------|
|           | [VIPS][MSA]     | DBSA     | St       |
| Film-O/IL | 62.0 wt%        | 25.0 wt% | 13.0 wt% |
| Film-Bi   | 43.8 wt%        | 37.5 wt% | 18.7 wt% |
| Film-IL/O | 25.0 wt%        | 37.5 wt% | 37.5 wt% |
